# Supplementary material for: Nasal Cytology on 241 Children: From Birth to the First 3 Years of Life and Association with Common Airways Diseases
Source: MDPI journal article supplement (doi:10.3390/jpm13040687), 2023-04-19
Supplement: s1 [file s1]

## Supplementary Materials

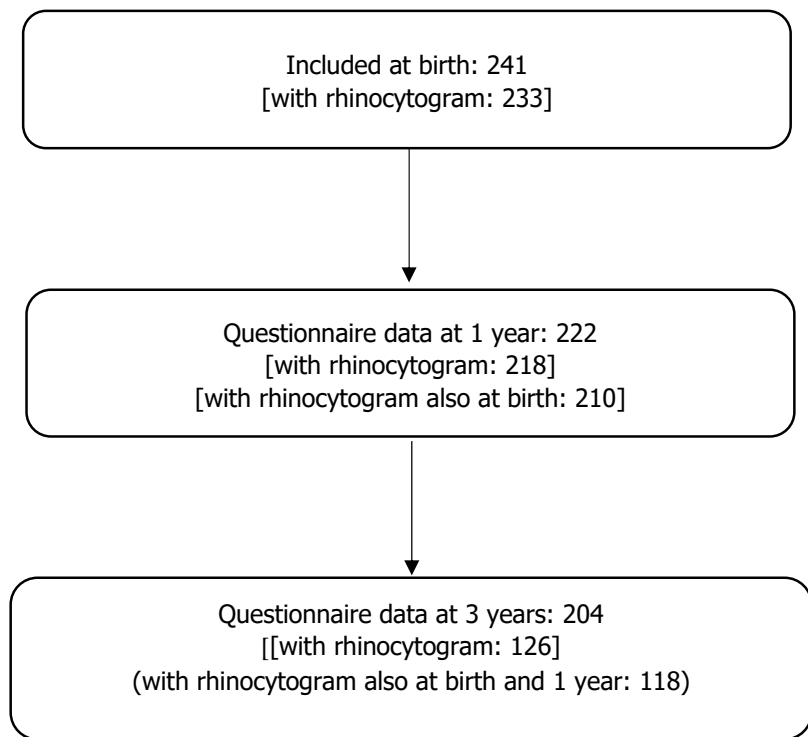

**Figure S1:** Patient's flow-chart

**Table S1.** Cross sectional association between acute otitis media (AOM), upper respiratory tract infections (URTI), bronchitis, allergy, and bronchial asthma/wheezing during the first year of life and nasal mucosal composition at 1 year.

|                         | AOM [n=31]               |                         |                       | URTI [n=200]             |                         |          | Bronchitis [n=59]        |                         |          | Allergy [n=14]           |                         |          | Bronchial asthma/wheezing [n=25] |                         |          |
|-------------------------|--------------------------|-------------------------|-----------------------|--------------------------|-------------------------|----------|--------------------------|-------------------------|----------|--------------------------|-------------------------|----------|----------------------------------|-------------------------|----------|
|                         | Yes<br>(% <sup>a</sup> ) | No<br>(% <sup>a</sup> ) | <i>p</i> <sup>b</sup> | Yes<br>(% <sup>a</sup> ) | No<br>(% <sup>a</sup> ) | <i>p</i> | Yes<br>(% <sup>a</sup> ) | No<br>(% <sup>a</sup> ) | <i>p</i> | Yes<br>(% <sup>a</sup> ) | No<br>(% <sup>a</sup> ) | <i>p</i> | Yes<br>(% <sup>a</sup> )         | No<br>(% <sup>a</sup> ) | <i>p</i> |
| <b>Muciparous cells</b> |                          |                         |                       |                          |                         |          |                          |                         |          |                          |                         |          |                                  |                         |          |
| <b>0/+</b>              | 24<br>(77.4)             | 125<br>(66.8)           |                       | 135<br>(67.5)            | 14<br>(77.8)            |          | 42<br>(71.2)             | 107<br>(67.3)           |          | 9<br>(64.3)              | 140<br>(68.6)           |          | 21<br>(84.0)                     | 128<br>(66.3)           |          |
| <b>++/+++/+</b>         | 7<br>(22.6)              | 62<br>(33.2)            | 0.241                 | 65<br>(32.5)             | 4<br>(22.2)             | 0.369    | 17<br>(28.8)             | 52<br>(32.7)            | 0.583    | 5<br>(35.7)              | 64<br>(31.4)            | 0.736    | 4<br>(16.0)                      | 65<br>(33.7)            | 0.074    |
| <b>Neutrophils</b>      |                          |                         |                       |                          |                         |          |                          |                         |          |                          |                         |          |                                  |                         |          |
| <b>0/+</b>              | 7<br>(22.6)              | 59<br>(31.6)            |                       | 60<br>(30.0)             | 6<br>(33.3)             |          | 14<br>(23.7)             | 52<br>(32.7)            |          | 0 (0)                    | 66<br>(32.4)            |          | 7<br>(28.0)                      | 59<br>(30.6)            |          |
| <b>++/+++/+</b>         | 24<br>(77.4)             | 128<br>(68.5)           | 0.314                 | 140<br>(70.0)            | 12<br>(66.7)            | 0.768    | 45<br>(76.3)             | 107<br>(67.3)           | 0.200    | 14<br>(100)              | 138<br>(67.7)           | 0.007    | 18<br>(72.0)                     | 134<br>(69.4)           | 0.792    |
| <b>Eosinophils</b>      |                          |                         |                       |                          |                         |          |                          |                         |          |                          |                         |          |                                  |                         |          |
| <b>0</b>                | 29<br>(93.6)             | 174<br>(93.6)           |                       | 185<br>(93.0)            | 18<br>(100)             |          | 53<br>(91.4)             | 150<br>(94.3)           |          | 13<br>(92.9)             | 190<br>(93.6)           |          | 22<br>(91.7)                     | 181<br>(93.8)           |          |
| <b>+</b>                | 2<br>(6.5)               | 12<br>(6.5)             | 0.999                 | 14<br>(7.0)              | 0 (0)                   | 0.613    | 5 (8.6)                  | 9<br>(5.7)              | 0.432    | 1<br>(7.1)               | 13<br>(6.4)             | 0.999    | 2<br>(8.3)                       | 12<br>(6.2)             | 0.657    |
| <b>Lymphocytes</b>      |                          |                         |                       |                          |                         |          |                          |                         |          |                          |                         |          |                                  |                         |          |
| <b>0</b>                | 27<br>(87.1)             | 144<br>(77.0)           |                       | 153<br>(76.5)            | 18<br>(100)             |          | 46<br>(78.0)             | 125<br>(78.6)           |          | 8<br>(57.1)              | 163<br>(79.9)           |          | 21<br>(84.0)                     | 50<br>(77.7)            |          |
| <b>+/++</b>             | 4<br>(12.9)              | 43<br>(23.0)            | 0.206                 | 47<br>(23.5)             | 0 (0)                   | 0.015    | 13<br>(22.0)             | 34<br>(21.4)            | 0.917    | 6<br>(42.9)              | 41<br>(20.1)            | 0.084    | 4<br>(16.0)                      | 43<br>(22.3)            | 0.473    |
| <b>Bacteria</b>         |                          |                         |                       |                          |                         |          |                          |                         |          |                          |                         |          |                                  |                         |          |
| <b>0</b>                | 14<br>(45.2)             | 77<br>(41.2)            |                       | 85<br>(42.5)             | 6<br>(33.3)             |          | 24<br>(40.7)             | 67<br>(42.2)            |          | 8<br>(57.1)              | 83<br>(40.7)            |          | 12<br>(48.0)                     | 79<br>(40.9)            |          |
| <b>+/++/+++</b>         | 17<br>(54.8)             | 110<br>(58.8)           | 0.677                 | 115<br>(57.5)            | 12<br>(66.7)            | 0.450    | 35<br>(59.3)             | 92<br>(57.9)            | 0.846    | 6<br>(42.9)              | 121<br>(59.3)           | 0.227    | 13<br>(52.0)                     | 114<br>(59.1)           | 0.500    |

<sup>a</sup> Column percentages.

<sup>b</sup> *p*-value from Chi-square test or Fisher exact test.
